# Supplementary material for: Enhanced electrochemical response of a modified glassy carbon electrode by poly(2-vinlypyridine-b-methyl methacrylate) conjugated gold nanoparticles for detection of nicotine
Source: Royal Society of Chemistry journal article supplement (doi:10.1039/c8ra06857g), 2018-01-01
Supplement: c8ra06857g1.pdf [file c8ra06857g1.pdf]

## Enhanced Electrochemical Response of Modified Glassy Carbon Electrode by Poly(2-vinylpyridine-*b*-methyl methacrylate) Conjugated Gold Nanoparticles for Detection of Nicotine

Sana Rahim, Asma Rauf, Saba Rauf, Muhammad Raza Shah, Muhammad Imran Malik\*

H.E.J. Research Institute of Chemistry, International Centre for Chemical and Biological Sciences (ICCBS), University of Karachi, Karachi 75270, Pakistan

\*E-mail: [mimran.malik@iccs.edu](mailto:mimran.malik@iccs.edu)

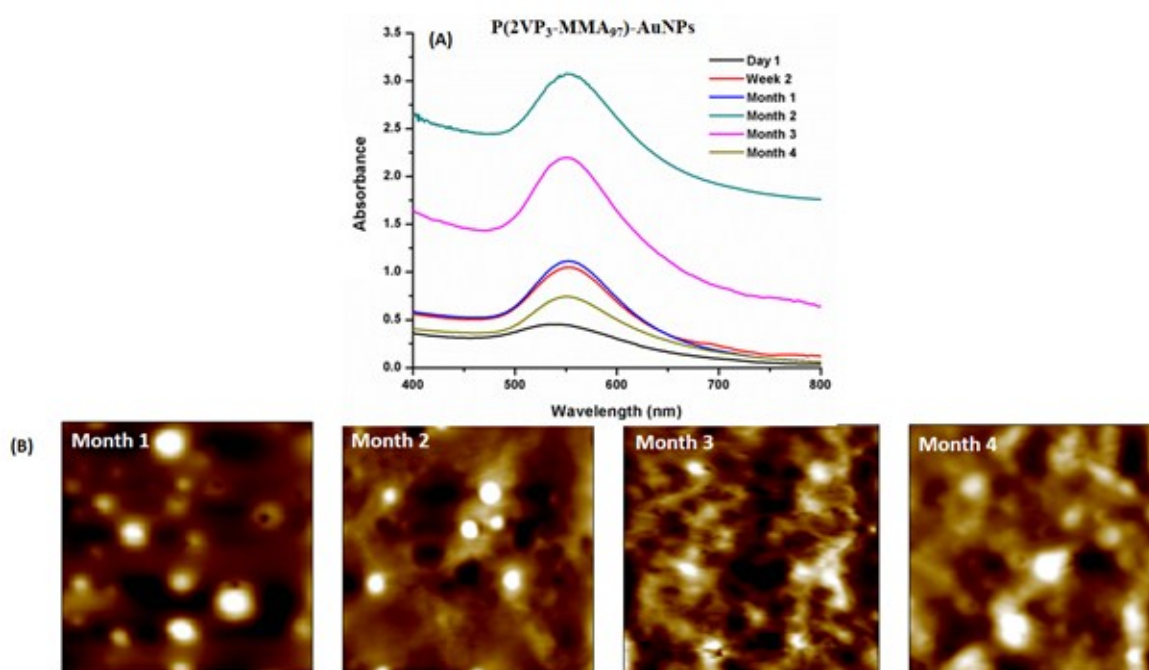

Figure S1. Time stability of P(2VP<sub>3</sub>-MMA<sub>97</sub>)-AuNPs (A) UV-vis spectroscopy (B) AFM images having 2x2 μm dimension.

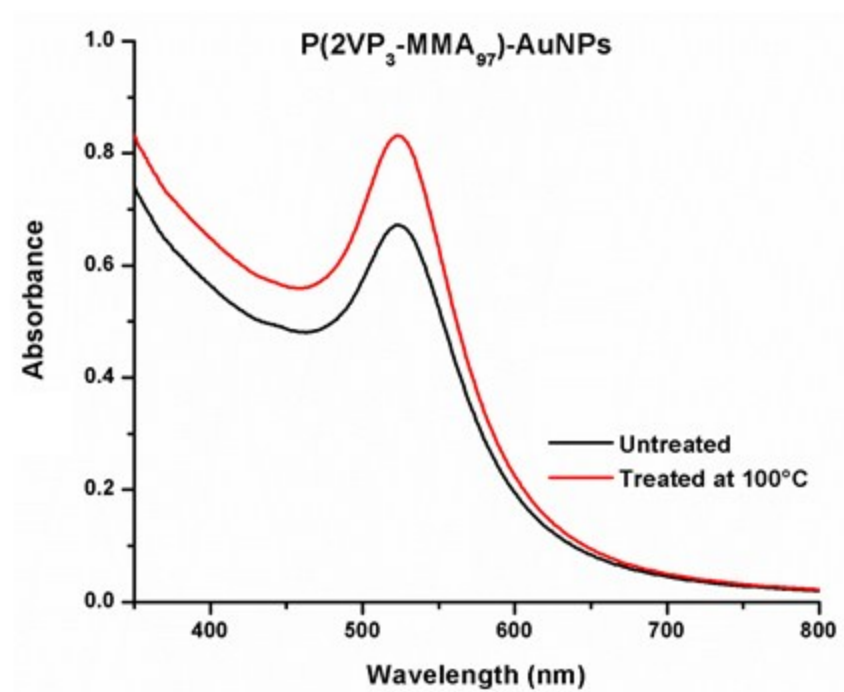

Figure S2. Enhancement in SPR band of P(2VP<sub>3</sub>-MMA<sub>97</sub>)-AuNPs after temperature treatment.

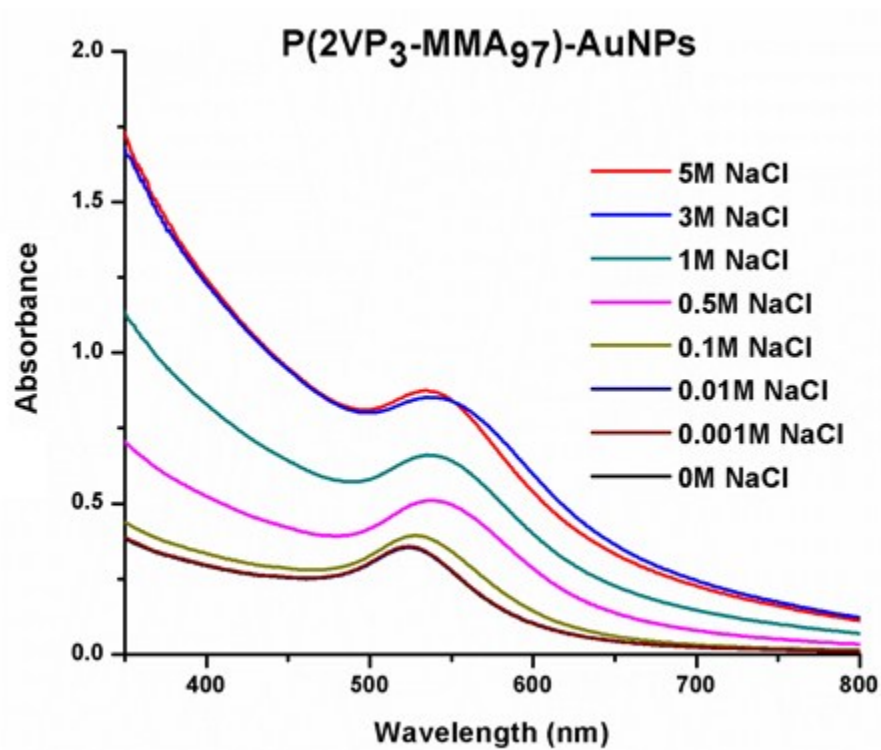

Figure S3. Effect of electrolyte concentration on the stability of P(2VP<sub>3</sub>-MMA<sub>97</sub>)-AuNPs.

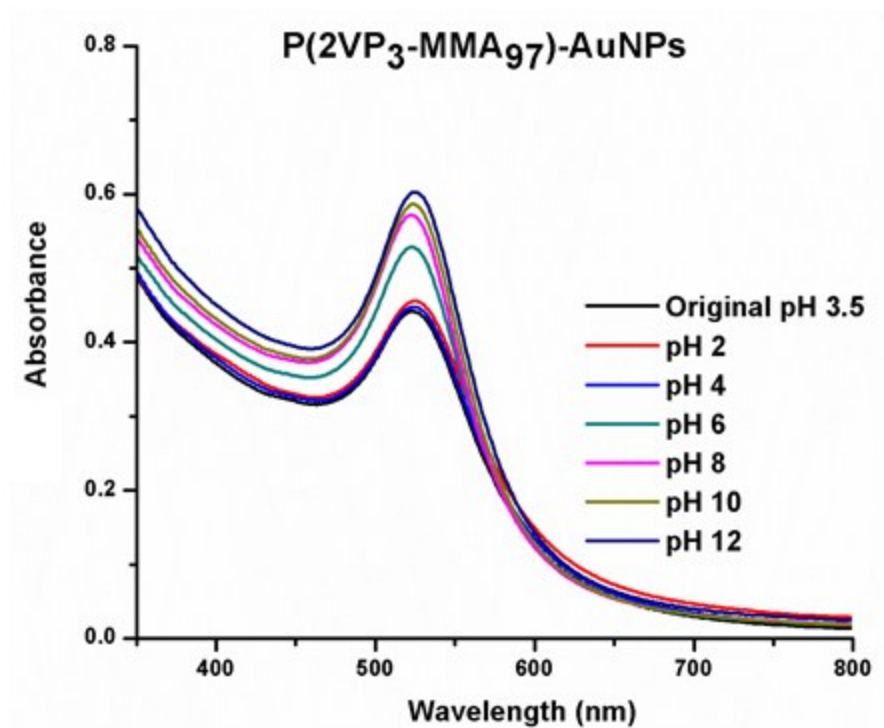

Figure S4. pH effect on stability of the P(2VP<sub>3</sub>-MMA<sub>97</sub>)-AuNPs.

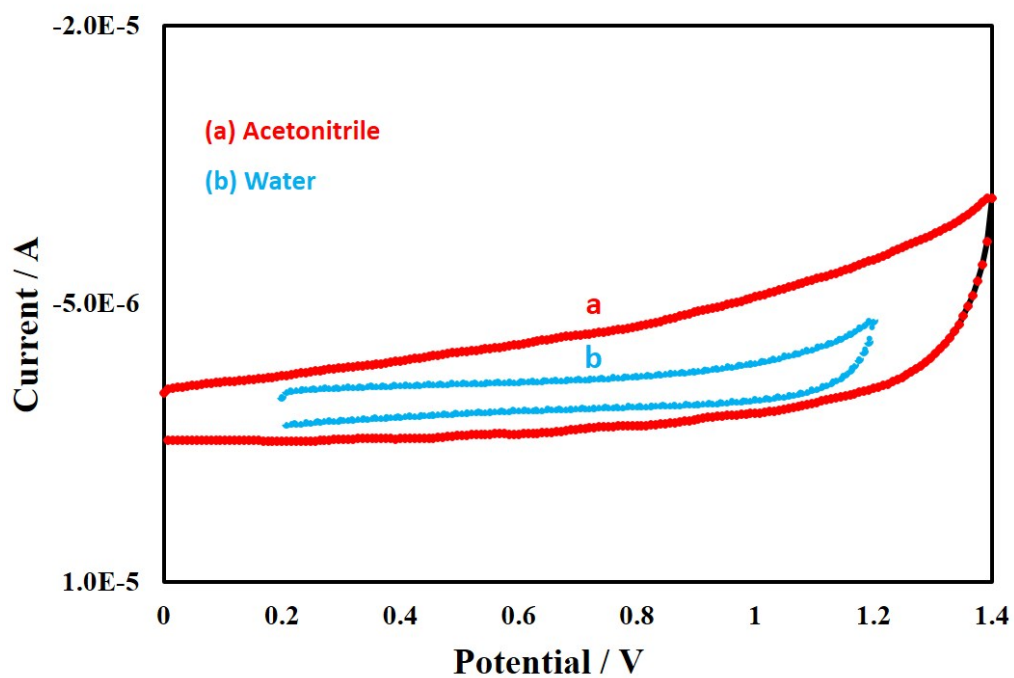

Figure S5. Cyclic voltammograms in the absence of nicotine on bare GCE while using (a) acetonitrile (b) water as a solvent.

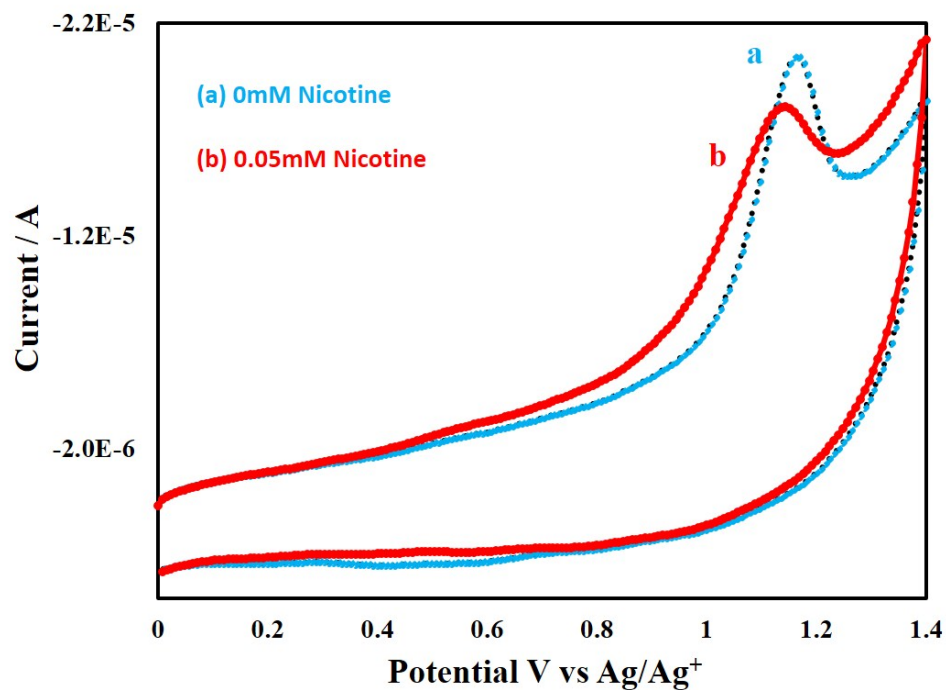

**Figure S6.** A comparative view of cyclic voltammograms (a) absence (0 mM) and (b) presence (0.05 mM) of nicotine on P(2VP<sub>3</sub>-MMA<sub>97</sub>)-AuNPs-GCE in acetonitrile.

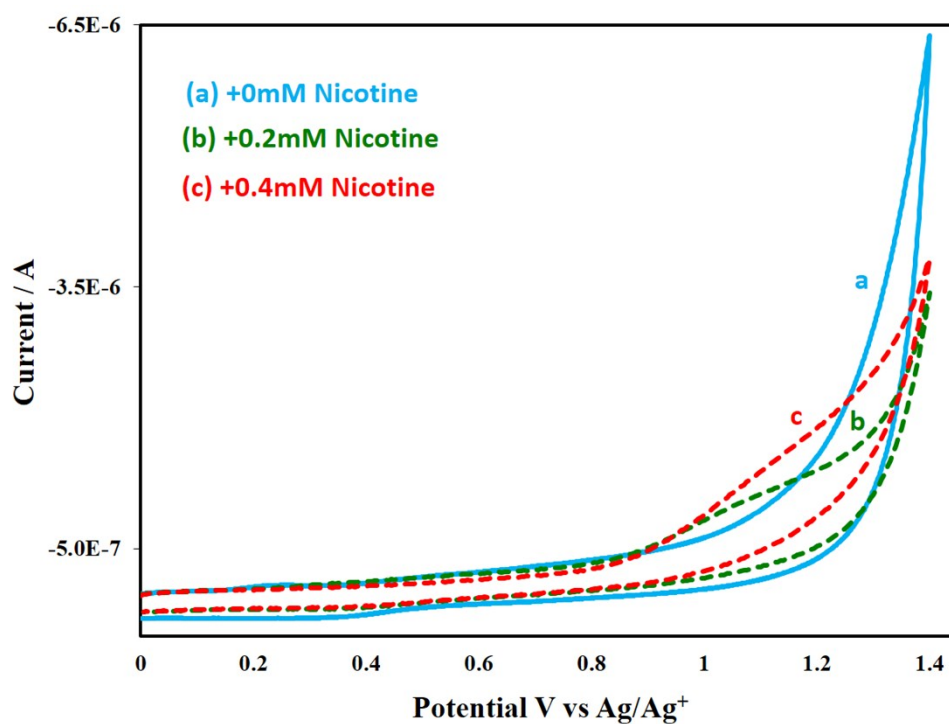

**Figure S7.** An overlay of (a) absence, (b) and (c) presence of nicotine on P(2VP<sub>3</sub>-MMA<sub>97</sub>)-GCE in acetonitrile at scan rate of 0.1 V.s<sup>-1</sup>.
